# Supplementary material for: Carbonic anhydrase IV inhibits colon cancer development by inhibiting the Wnt signalling pathway through targeting the WTAP–WT1–TBL1 axis
Source: HighWire-hosted journal article supplement (doi:10.1136/gutjnl-2014-308614), 2015-06-12

## Supplementary Figures

**Figure S1. CA4 expression status in colon cancer cell lines and in different human tissues.** (A) mRNA expression of six candidate genes identified by MeDIP array was examined in colon cancer cell lines and in normal colon tissue by RT-PCR. (B) CA4 mRNA expression in human normal tissues.  $\beta$ -actin served as loading control.

S Figure 1

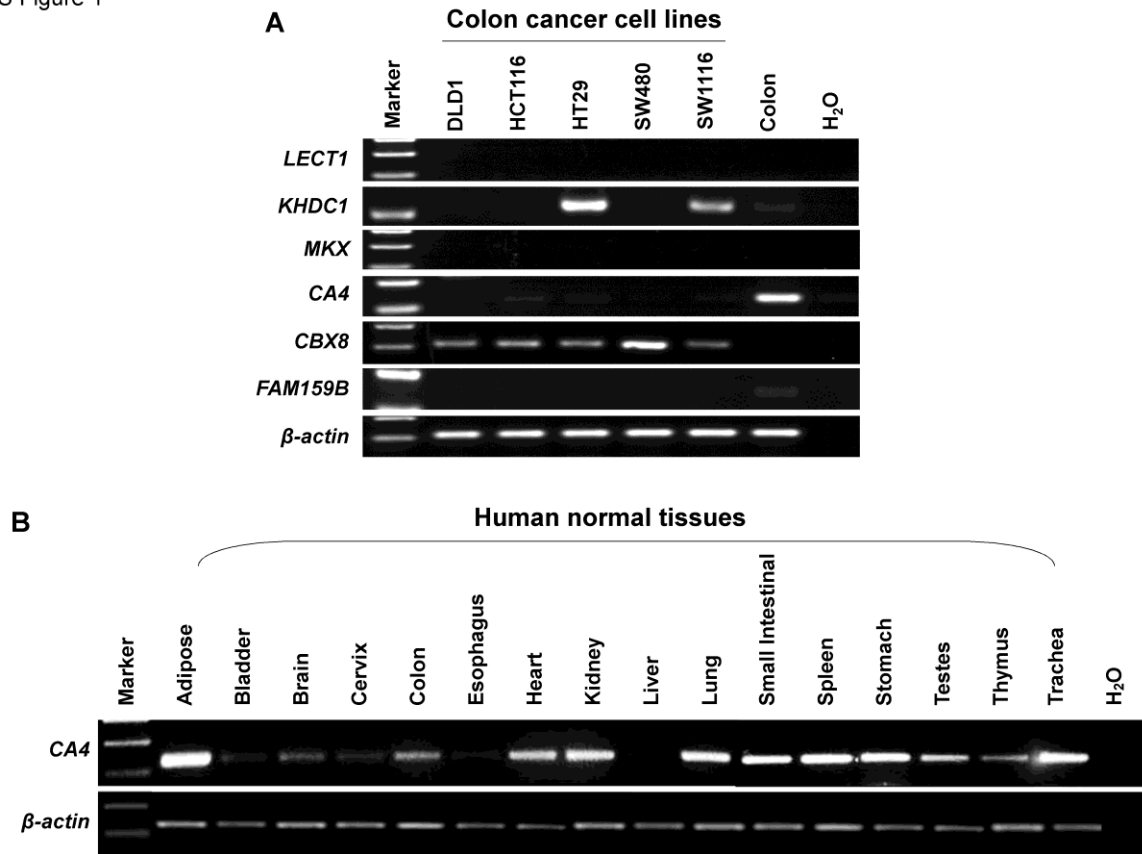

**Figure S2. To determine the effect of siRNA against *TBL1*.** (A) To confirm the knockdown effect of *TBL1* siRNA in HCT116 and SW1116 cells. (B) Knockdown of *TBL1* did not alter the expression level of *WTAP*. Real-time PCR was employed to determine the expression level. Fold changed in the corresponding gene expression was relative to untreated cells.  $\beta$ -actin served as internal control.

Figure S2

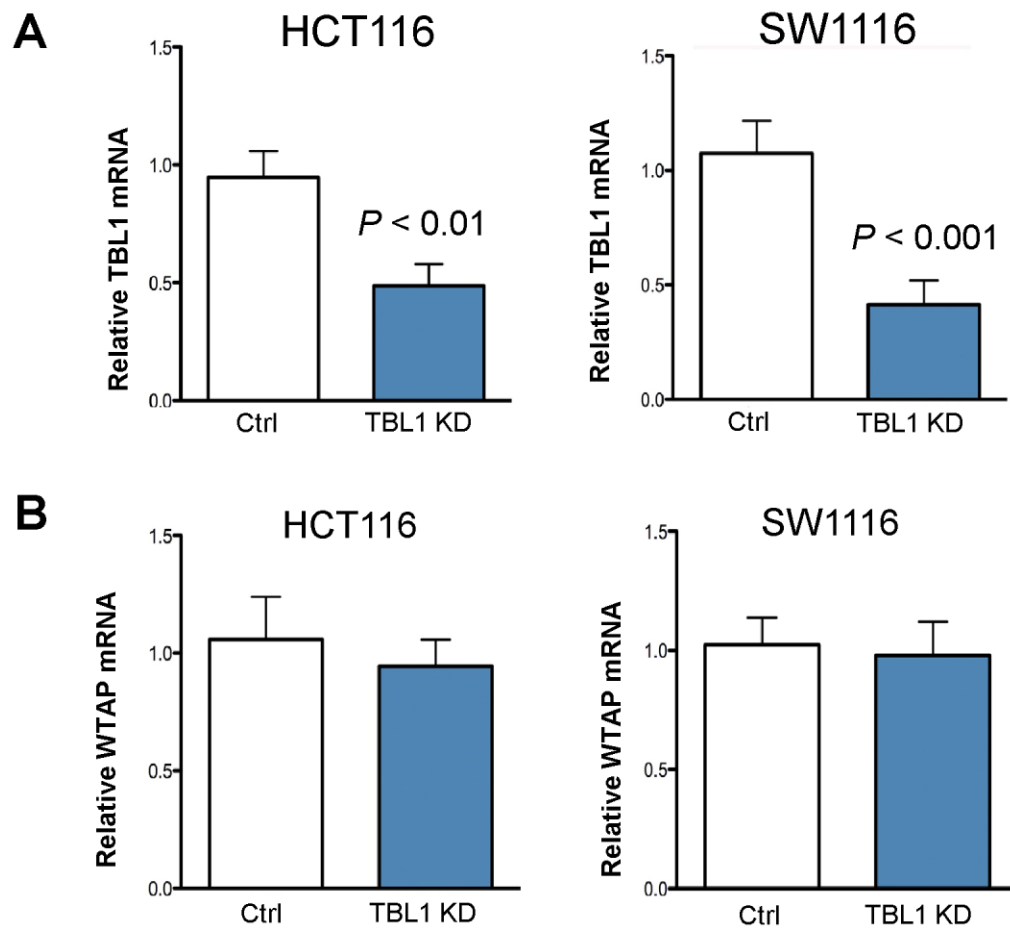

Supplement: gutjnl-2014-308614supp_figures.pdf [file gutjnl-2014-308614supp_figures.pdf]
